# Supplementary material
Source: PubMed Central journal article supplement (PMC3078343)
Supplement: 1102746108_pnas.201102746SI.pdf [file 1102746108_pnas.201102746SI.pdf]

# Supporting Information

Onda et al. 10.1073/pnas.1102746108

## SI Materials and Methods

Amino acid sequence of toxin present in HA22-LR-PE38:  
AKASGGRHRQPRGWEQLPTG AEFLGDGGDVSFSTR  
GTQNW TVERLLQAHRQLEERGYVFGYHGTFLAAQ  
SIVFGGVRA RSQDLDAIWRGFYIAGDPAL AYGAAQD

QEPDARGRIRNGA LLRVYVPRSSLPGFYRTSLT LAA  
PEAAGEVERLIGHPLPL RLDAITGPEEEGGRLLETILGWP  
LAERTVVIPSAIPTDPRN VGGDLDPSSIPDKEQAISAL PD  
YASQPGKPPREDLK.

First Ala is the final residue of the HA22 VH.

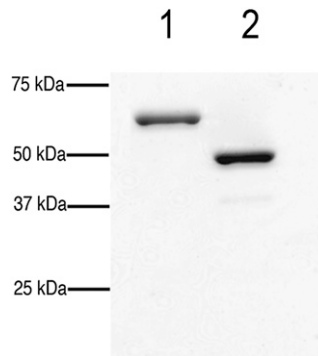

**Fig. S1.** Nonreducing SDS/PAGE of HA22 (1) and HA22-LR-8M (2) stained with Coomassie blue. HA22-LR-8M migrates as a single protein of the expected molecular weight of 50.5 kDa.

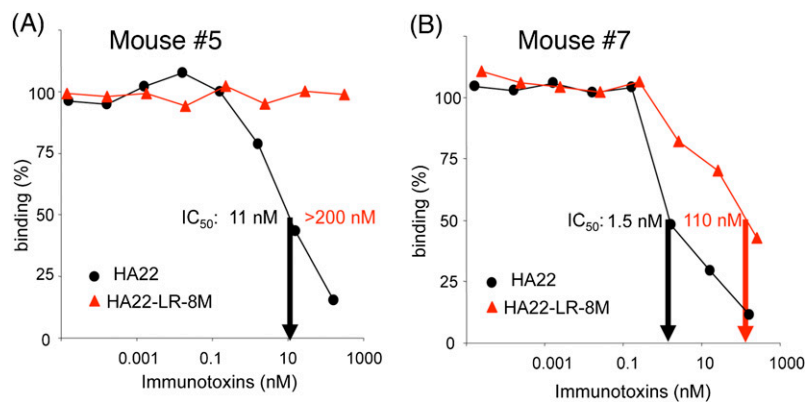

**Fig. S2.** Mouse antigenicity. Antidrug antibodies were produced by mice immunized with HA22. Typical results of competition assays using mouse serum #5 (A) and #7 (B) are shown. The concentration of HA22 and HA22-LR-8M at which binding to PE38 was inhibited by 50% ( $IC_{50}$ ) was 11 nM and >200 nM, respectively, for serum #5 (A) and 1.5 nM and 110 nM, respectively, for serum #7 (B). The binding ( $IC_{50}$ ) ratios of HA22 to HA22-LR-8M are <5.5% for mouse #5 and 1.4% for mouse #7. We analyzed serum from a total of seven mice, and their binding ratios are shown in Table 2.

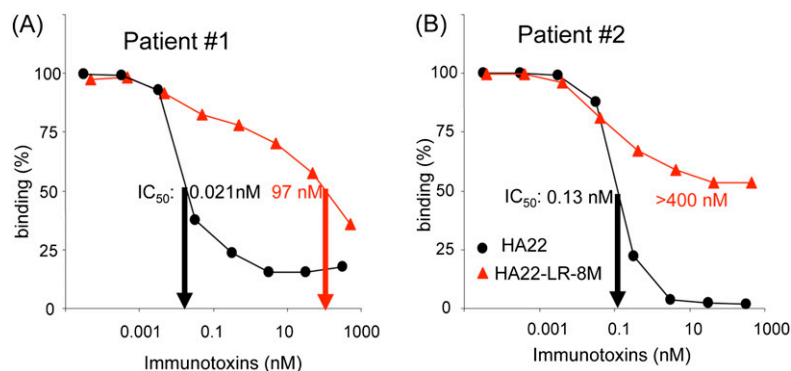

**Fig. S3.** Human antigenicity. Anti-drug antibodies were produced in patients undergoing clinical trials with HA22. Typical results of competition assays using human serum #1 (A) and #2 (B) are shown. The concentration of HA22 and HA22-LR-8M at which binding to PE38 was inhibited by 50% ( $IC_{50}$ ) was 0.021 nM and 97 nM, respectively, for patient #1 (A) and 0.13 nM and >400 nM, respectively, for patient #2 (B). The binding ( $IC_{50}$ ) ratios of HA22 to HA22-LR-8M are 0.022% for patient #1 and <0.033% for patient #2. We analyzed serum from a total of nine patients, and their binding ratios are shown in Table 3.
